# Supplementary material for: A Tuneable, Photocurable, Poly(Caprolactone)-Based Resin for Tissue Engineering—Synthesis, Characterisation and Use in Stereolithography
Source: PubMed Central journal article supplement (PMC7956195; doi:10.3390/molecules26051199), 2021-02-24
Supplement: molecules-26-01199-s001.pdf [file molecules-26-01199-s001.pdf]

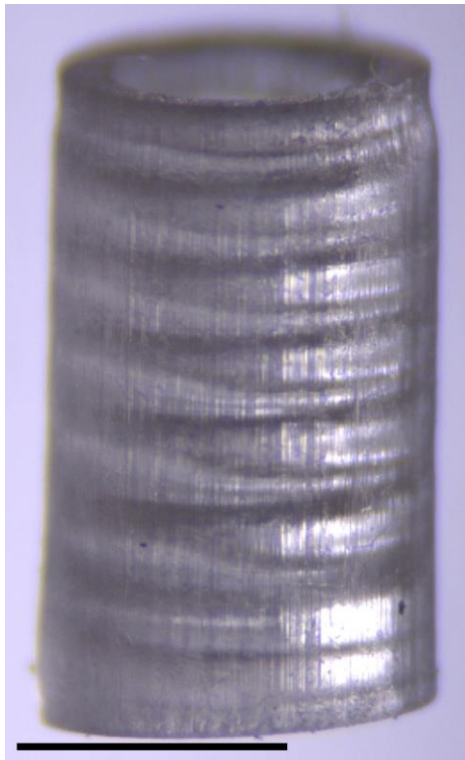

**Figure S1.** Optical microscopy image of a PCLMA tube produced via microstereolithography with non-optimal curing conditions. Lateral ridges can be seen due to overcuring of the material as a result of high laser power and the higher viscosity of room temperature resin. Scale bar: 1 mm.

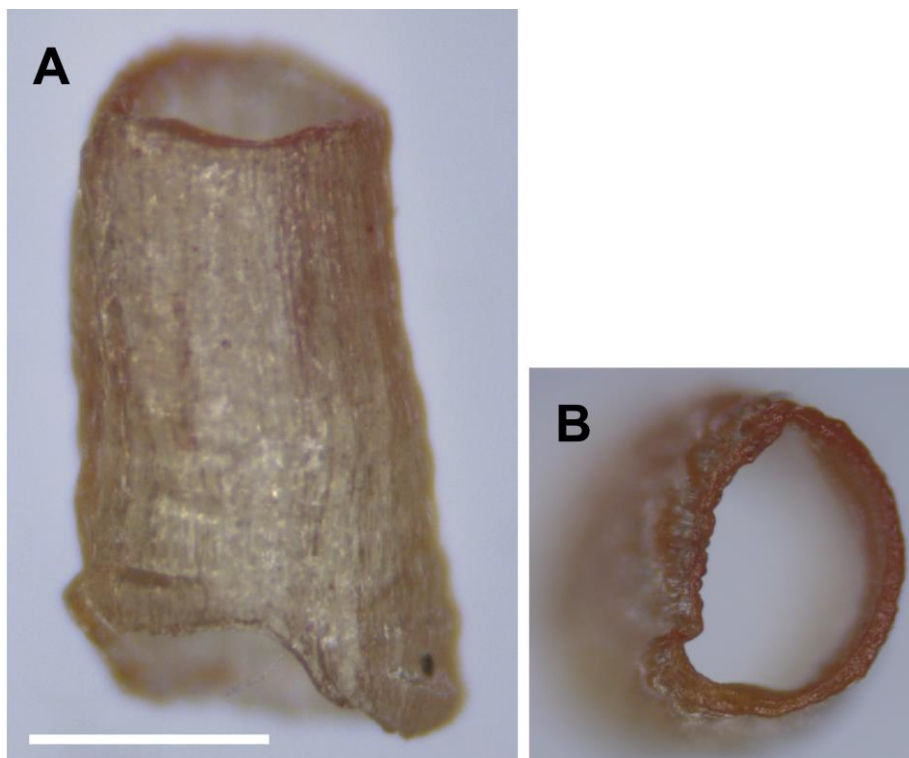

**Figure S2.** The effect of light absorbers in  $\mu$ SL. Side view (A) and top view (B) of an under-cured tube produced by  $\mu$ SL with PCLMA containing too high a concentration of  $\beta$ -carotene (0.2%). Scale bar: 1 mm.
